# Supplementary material
Source: ML conference proceedings conference paper supplement (https://proceedings.mlr.press/v89/he19a.html)
Supplement: Supplementary file 1 [file he19a-supp.pdf]

# Supplement to “XBART: Accelerated Bayesian Additive Regression Trees”

**Jingyu He**  
University of Chicago

**Saar Yalov**  
Arizona State University

**P. Richard Hahn**  
Arizona State University

## Abstract

This abstract contains simulation results that were unable to fit in the main document as well as a comparison on a variety of smaller empirical data sets.

## 1 Additional Simulation Study

This simulation study is identical to the one in the main text, but is at a smaller sample size of  $n = 10,000$ , so that it can include two additional methods, the standard MCMC BART model, and random forests, implemented by R packages `dbarts` and `ranger` (Wright and Ziegler, 2015) respectively.

This simulation was computed on an Ubuntu 18.04.1 LTS with Intel i7-8700K Hexa-core 3.7GHz 12MB Cache-64-bit processing, 4.3GHz overclocking speed, as were the simulations from the main paper. The simulation results in Tables 1 and 2 should be fairly self-explanatory, but the overall narrative that emerges is that BART and XBART look quite similar and that on this collection of functions they perform better than the alternatives in terms of function estimation. Further, random forests works well in high noise settings and neural networks work best in low noise settings and in particular on the linear data generating process. In both high noise and low noise case, XBART and BART do similar in terms of root mean squared error (RMSE), but XBART is about 10 times faster than `dbarts`. Further, XBART performs better than XGBoost with cross validation.

Proceedings of the 22<sup>nd</sup> International Conference on Artificial Intelligence and Statistics (AISTATS) 2019, Naha, Okinawa, Japan. PMLR: Volume 89. Copyright 2019 by the author(s).

Table 1: Low noise case,  $\kappa = 1$  and  $n = 10K$

| Function     | Method          | RMSE | Seconds |
|--------------|-----------------|------|---------|
| Linear       | XBART           | 1.74 | 20      |
| Linear       | XGBoost Tuned   | 2.63 | 64      |
| Linear       | XGBoost Untuned | 3.23 | < 1     |
| Linear       | Random Forest   | 3.56 | 6       |
| Linear       | BART            | 1.50 | 117     |
| Linear       | Neural Network  | 1.39 | 26      |
| Trig + Poly  | XBART           | 1.31 | 17      |
| Trig + Poly  | XGBoost Tuned   | 2.08 | 61      |
| Trig + Poly  | XGBoost Untuned | 2.70 | < 1     |
| Trig + Poly  | Random Forest   | 3.04 | 6       |
| Trig + Poly  | BART            | 1.30 | 115     |
| Trig + Poly  | Neural Network  | 3.96 | 26      |
| Max          | XBART           | 0.39 | 16      |
| Max          | XGBoost Tuned   | 0.42 | 62      |
| Max          | XGBoost Untuned | 0.79 | < 1     |
| Max          | Random Forest   | 0.41 | 6       |
| Max          | BART            | 0.44 | 114     |
| Max          | Neural Network  | 0.40 | 30      |
| Single Index | XBART           | 2.27 | 17      |
| Single Index | XGBoost Tuned   | 2.65 | 61      |
| Single Index | XGBoost Untuned | 3.65 | < 1     |
| Single Index | Random Forest   | 3.45 | 6       |
| Single Index | BART            | 2.03 | 116     |
| Single Index | Neural Network  | 2.76 | 28      |

Table 2: High noise case,  $\kappa = 10$  and  $n = 10K$

| Function     | Method          | RMSE  | Seconds |
|--------------|-----------------|-------|---------|
| Linear       | XBART           | 5.07  | 16      |
| Linear       | XGBoost Tuned   | 8.04  | 61      |
| Linear       | XGBoost Untuned | 21.25 | < 1     |
| Linear       | Random Forest   | 6.52  | 6       |
| Linear       | BART            | 6.64  | 111     |
| Linear       | Neural Network  | 7.39  | 12      |
| Trig + Poly  | XBART           | 4.94  | 16      |
| Trig + Poly  | XGBoost Tuned   | 7.16  | 61      |
| Trig + Poly  | XGBoost Untuned | 17.97 | < 1     |
| Trig + Poly  | Random Forest   | 6.34  | 7       |
| Trig + Poly  | BART            | 6.15  | 110     |
| Trig + Poly  | Neural Network  | 8.20  | 13      |
| Max          | XBART           | 1.94  | 16      |
| Max          | XGBoost Tuned   | 2.76  | 60      |
| Max          | XGBoost Untuned | 7.18  | < 1     |
| Max          | Random Forest   | 2.30  | 6       |
| Max          | BART            | 2.46  | 111     |
| Max          | Neural Network  | 2.98  | 15      |
| Single Index | XBART           | 7.13  | 16      |
| Single Index | XGBoost Tuned   | 10.61 | 61      |
| Single Index | XGBoost Untuned | 28.68 | < 1     |
| Single Index | Random Forest   | 8.99  | 6       |
| Single Index | BART            | 8.69  | 111     |
| Single Index | Neural Network  | 9.43  | 14      |

## 2 Real Data Experiments

To compare the performance on real data we recreated the data experiment used in the original BART paper (Chipman et al., 2010). We used 40 datasets of varying sizes. For each dataset, 20 random train test splits were made, yielding a total of 800 experiments. In each experiment we fit XBART, BART, Random Forest, XGBoost with default features, and a tuned XGBoost model with the same tuning parameters choices as in the main. Following (Chipman et al., 2010), we compare the methods using relative RMSE (RRMSE) defined as the RMSE divided by the minimum RMSE achieved, across methods, in each train/test split. Because the smaller data sets permitted more iterations, we set  $K = 800$  and  $I = 200$ , rather than  $K = 40$  and  $I = 15$  for the larger sample sizes.

The results are reported in Table 3. For reference, the dataset names and dimensions are given in Table 4; see Kim et al. (2007) for more details. Our appraisal is that this collection of datasets is not especially informative, especially in light of our simulation studies where the truth is known. In particular, for most of the 40 data sets there was essentially a three-way tie between random forests, gradient boosting, and XBART. From the simulation study above, this suggests that the data have quite weak signal, as that is the regime where random forests is competitive with the other two methods. BART fit by the standard random walk MCMC does appear to do somewhat better on average, although at three times the computation time. It will be interesting to see if implementing the proper Metropolis-Hastings adjustment brings XBART and BART into closer agreement on these high-noise, low sample size data sets.

Table 3: Results

|            | BART   | XBART | XGB_CV | RF    | XGB   |
|------------|--------|-------|--------|-------|-------|
| Avg. RRMSE | 1.067  | 1.128 | 1.137  | 1.139 | 1.170 |
| Avg. Time  | 16.930 | 5.680 | 6.207  | 0.385 | 0.117 |

## References

- Chipman, H. A., George, E. I., McCulloch, R. E., et al. (2010). BART: Bayesian additive regression trees. *The Annals of Applied Statistics*, 4(1):266–298.
- Kim, H., Loh, W.-Y., Shih, Y.-S., and Chaudhuri, P. (2007). Visualizable and interpretable regression models with good prediction power. *IIE Transactions*, 39(6):565–579.

Table 4: Data Sets

| Name     | n    | Name    | n    |
|----------|------|---------|------|
| Abalone  | 4177 | Fat     | 252  |
| Ais      | 202  | Fishery | 6806 |
| Alcohol  | 2462 | Hatco   | 100  |
| Amenity  | 3044 | Insur   | 2182 |
| Attend   | 838  | Labor   | 2953 |
| Baseball | 263  | Laheart | 200  |
| Baskball | 96   | Medical | 4406 |
| Boston   | 506  | Mpg     | 392  |
| Budget   | 1729 | Mumps   | 1523 |
| Cane     | 3775 | Mussels | 201  |
| Cardio   | 375  | Ozone   | 330  |
| College  | 694  | Price   | 159  |
| Cps      | 534  | Rate    | 144  |
| Cpu      | 209  | Rice    | 171  |
| Deer     | 654  | Scenic  | 113  |
| Diabetes | 375  | Servo   | 167  |
| Diamond  | 308  | Smsa    | 141  |
| Edu      | 1400 | Strike  | 625  |
| Enroll   | 258  | Tecator | 215  |
| Fame     | 1318 | Tree    | 100  |

Wright, M. N. and Ziegler, A. (2015). ranger: A fast implementation of random forests for high dimensional data in C++ and R. *arXiv preprint arXiv:1508.04409*.
